# Supplementary material for: Small-scale heat detection using catalytic microengines irradiated by laser
Source: Royal Society of Chemistry journal article supplement (doi:10.1039/c2nr32494f), 2012-12-03
Supplement: c2nr32494f.pdf [file c2nr32494f.pdf]

## Electronic Supplementary Information for:

### Small-scale heat detection using catalytic microengines irradiated by laser

Zhaoqian Liu,<sup>a,b</sup> Jinxing Li,<sup>a,b</sup> Jiao Wang,<sup>a</sup> Gaoshan Huang,<sup>a</sup> Ran Liu,<sup>\*b</sup> and Yongfeng Mei<sup>\*a,b</sup>

<sup>a</sup> Department of Materials Science, Fudan University, Shanghai 200433, People's Republic of China. Email: yfm@fudan.edu.cn; Fax: +86-21-6564 3615; Tel: +86-21-65642829

<sup>b</sup> State Key Lab of ASIC and System, Fudan University, Shanghai 200433, People's Republic of China. E-mail: rliu@fudan.edu.cn

#### One supplementary figure and four supplementary videos:

- (1). Supplementary-Figure 1.
- (2). Calculation of the laser power density.
- (3). Suppl Video 1 real time for Fig.1b and c.wmv.
- (4). Suppl Video 2 real time for Fig.2.wmv.
- (5). Suppl Video 3 real time Fig.3.wmv.
- (6). Suppl Video 4 real time for Fig.4.wmv.
- (7). Suppl Video 5 real time for Fig.5.wmv.

#### (1) Supplementary-Figure 1.

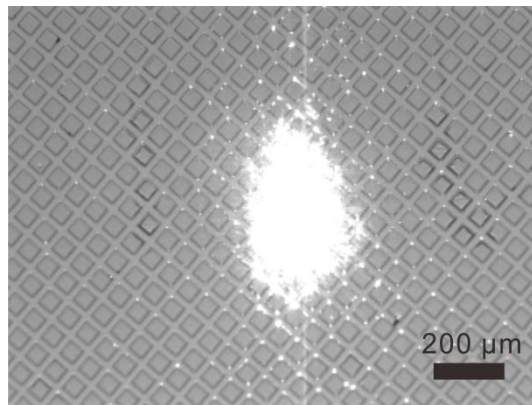

Supplementary-Figure 1. Optical image of a focused laser spot on a patterned substrate.

#### (2). Calculation of the laser power density.

The 980 nm laser used in our work has a maximum power of 1 W, and the diameter of the laser beam is ~0.8 cm. Thus, as a rough estimation, we can calculate the average power density by assuming a uniform power distribution in the laser spot:

Power density=total power/area of the spot= $1 \text{ W}/(\pi \times 0.4 \text{ cm} \times 0.4 \text{ cm})=2 \text{ W/cm}^2$ .
